# Supplementary material
Source: PubMed Central journal article supplement (PMC2743486)
Supplement: NIHMS106874-supplement-Supplemental_Figure_1.pdf [file NIHMS106874-supplement-Supplemental_Figure_1.pdf]

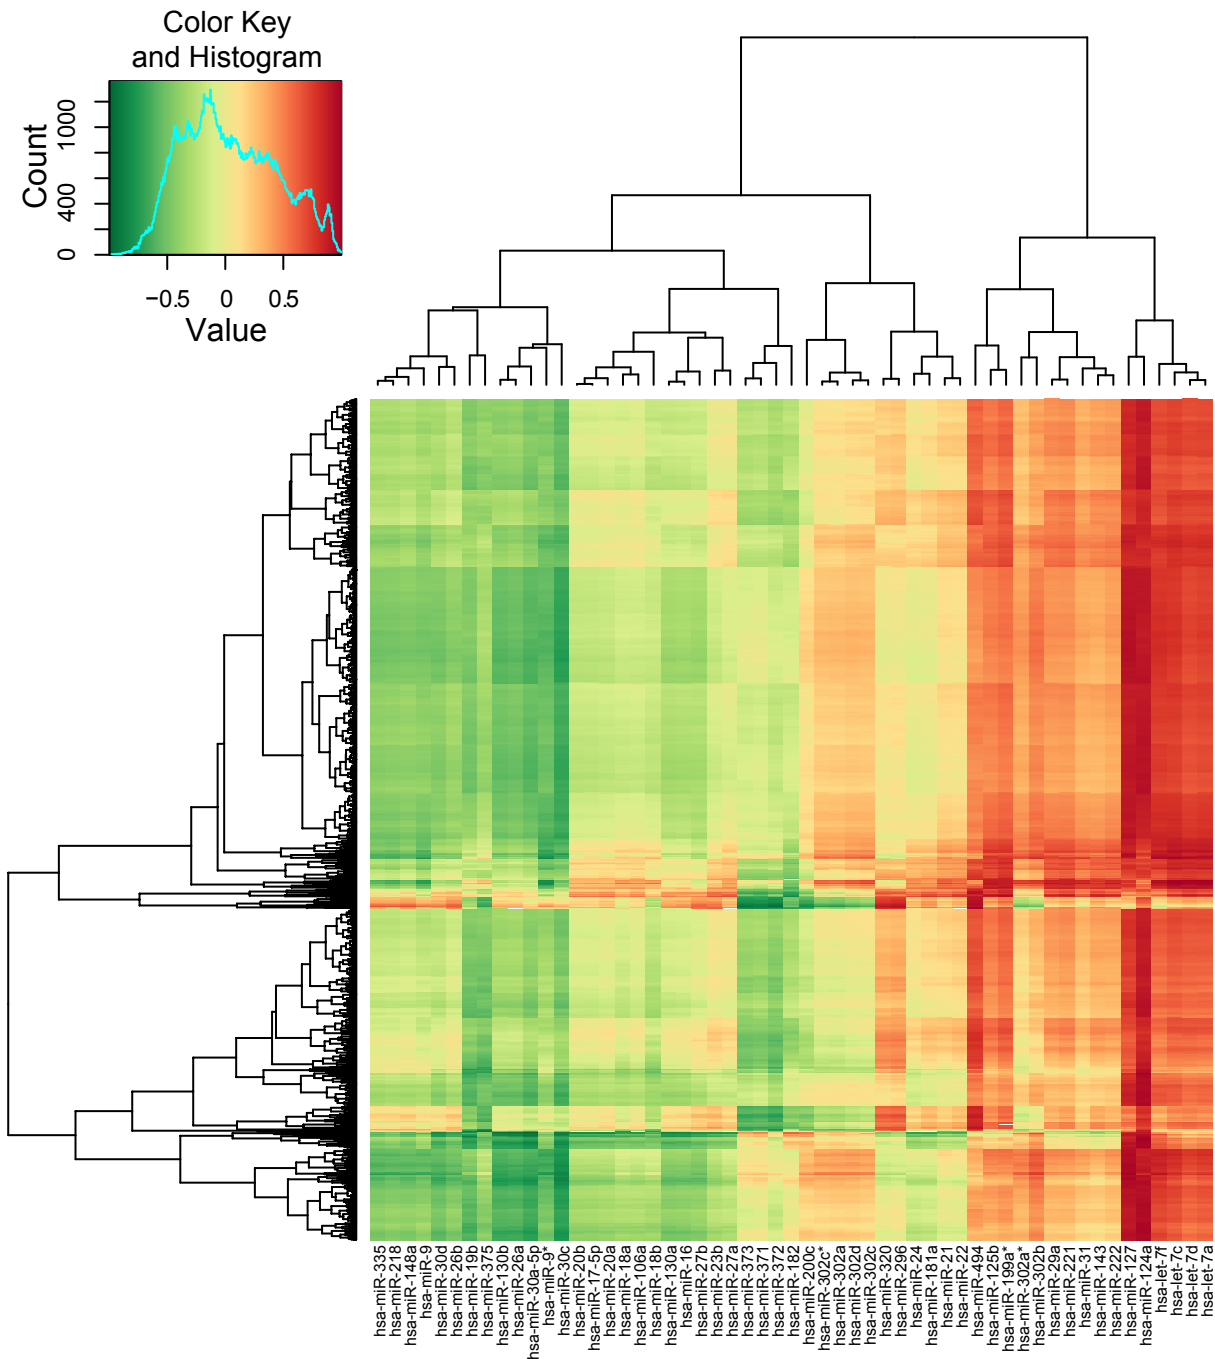

**Supplemental Figure 1: Cross-correlation heatmap of mRNA and microRNA expression patterns.**

Gene expression data were modeled as described, and genes significantly different under at least one condition were correlated. A cross-correlation table (Supplemental Table 4) was plotted as a heatmap using R, including dendrograms showing relatedness among either the mRNAs or microRNAs. Names of microRNAs are shown but there are too many mRNAs to display.
